# Supplementary material
Source: Springer Nature journal article supplement (https://www.springermedizin.de/resource/supplementary/12885_2014_4736_MOESM5_ESM.pdf/9467148)

**A****Normal****Low grade CIN****High grade CIN****Cancer****API5**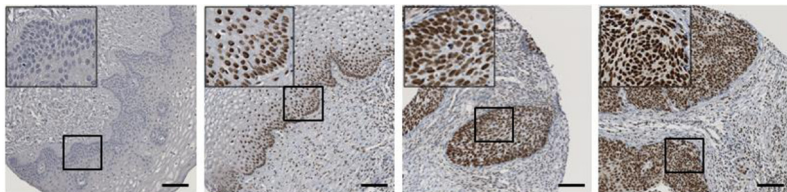**pERK1/2**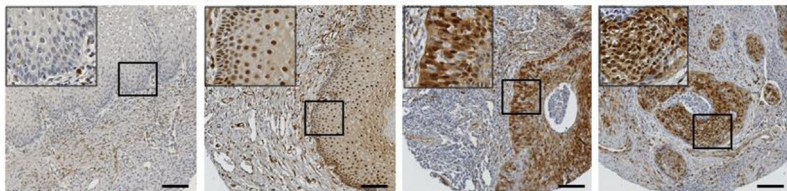**B**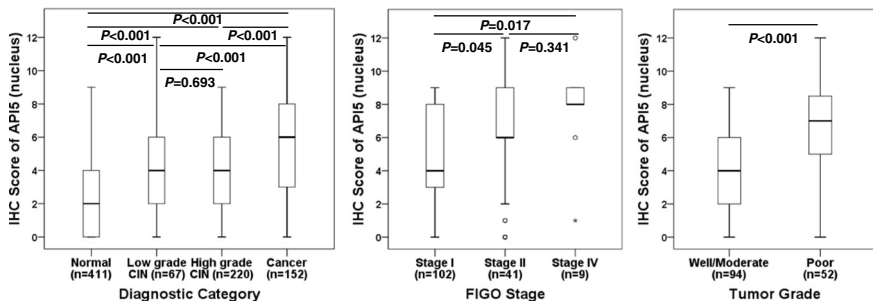

Supplement: MOESM5 [file 9467148]
